# Supplementary material for: Controllable synthesis of nanostructured bismuth vanadate thin films as an efficient catalyst for photoelectrochemical water splitting
Source: Royal Society of Chemistry journal article supplement (doi:10.1039/d3nj01456h), 2023-01-01
Supplement: d3nj01456h1.pdf [file d3nj01456h1.pdf]

*Supporting information*

**Controllable synthesis of nanostructured bismuth vanadate thin films as an efficient catalyst for photoelectrochemical water splitting**

Arreerat Jiamprasertboon,<sup>a,b</sup> Sarunya Sertwatsana,<sup>a</sup> Lappawat Ngamwongwan,<sup>c</sup> Weradesh Sangkhun,<sup>d</sup> Anurak Waehayee,<sup>a,b</sup> Praphaiphon Phonsuksawang,<sup>a,b</sup> Atipong Bootchanont,<sup>e</sup> Supinya Nijpanich,<sup>f</sup> Wutthikrai Busayaporn,<sup>f</sup> Hideki Nakajima,<sup>f</sup> Suwit Suthirakun,<sup>a</sup> Teera Butburee,<sup>\*d</sup> and Theeranun Siritanon,<sup>\*a</sup>

- <sup>a</sup> School of Chemistry, Institute of Science, Suranaree University of Technology, 111 University Avenue, Muang, Nakhon Ratchasima, 30000 (Thailand)
- <sup>b</sup> Institute of Research and Development, Suranaree University of Technology, 111 University Avenue, Muang, Nakhon Ratchasima, 30000 (Thailand)
- <sup>c</sup> School of Physics, Institute of Science, Suranaree University of Technology, 111 University Avenue, Muang, Nakhon Ratchasima, 30000 (Thailand)
- <sup>d</sup> Division of Physics, Faculty of Science and Technology, Rajamangala University of Technology Thanyaburi (RMUTT), Pathumthani 12110 (Thailand)
- <sup>e</sup> Synchrotron Light Research Institute, 111 University Avenue, Muang, Nakhon Ratchasima, 30000 (Thailand)
- <sup>f</sup> National Nanotechnology Center, National Science and Technology Development Agency, 111 Thailand Science Park, Pathum Thani 12120 (Thailand)

\*Corresponding authors' e-mails :[theeranun@sut.ac.th](mailto:theeranun@sut.ac.th) and [teera.but@nanotec.or.th](mailto:teera.but@nanotec.or.th)

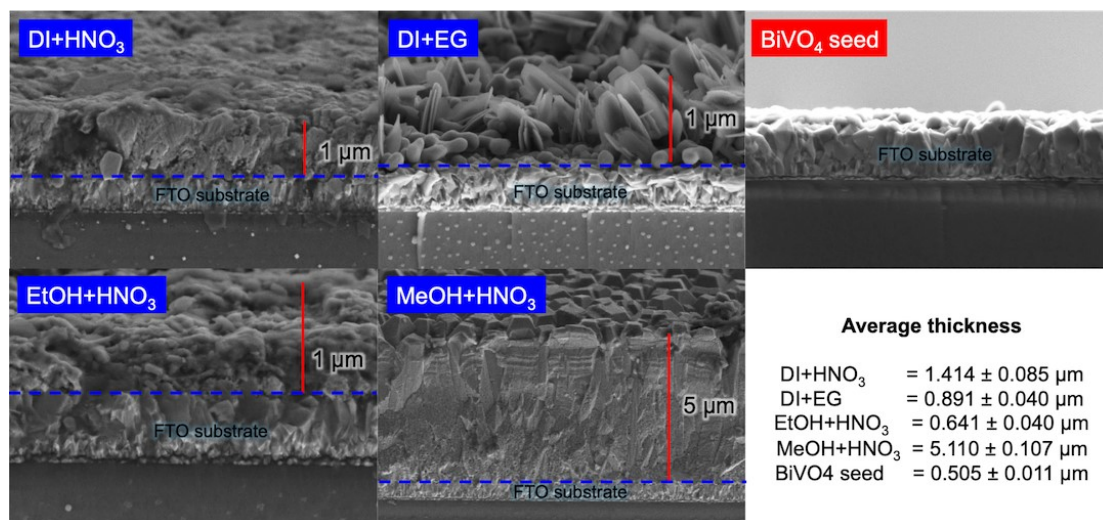

**Figure S1.** Cross-sectional SEM images of all prepared BiVO<sub>4</sub> films and BiVO<sub>4</sub> seed.

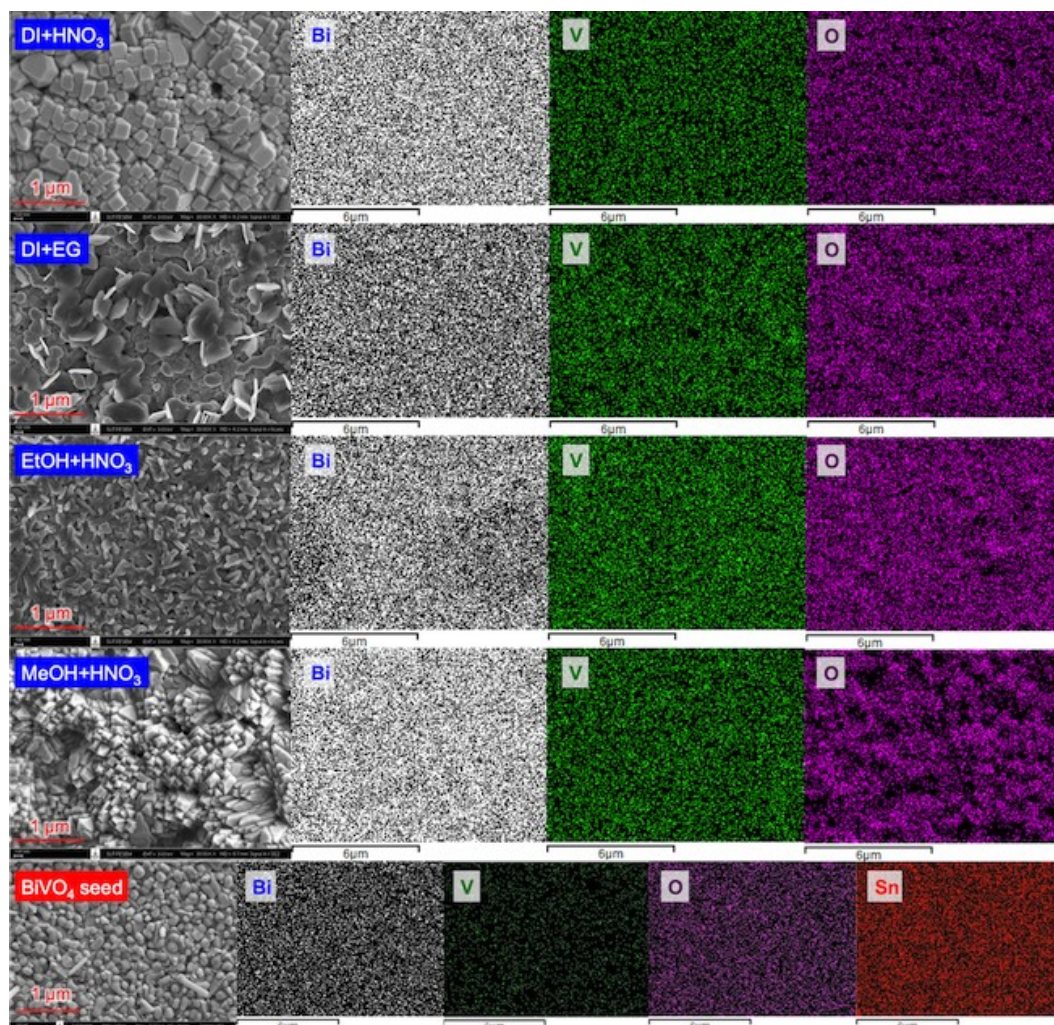

**Figure S2.** SEM images and EDS mappings of Bi, V and O in all BiVO<sub>4</sub> films prepared using different solvents and BiVO<sub>4</sub> seed.

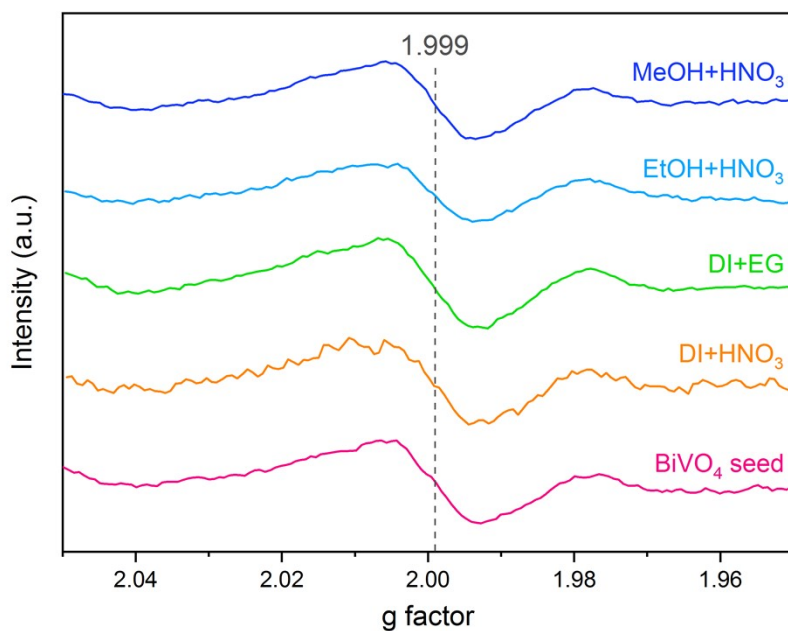

**Figure S3.** EPR spectra of all BiVO<sub>4</sub> film prepared using various solvents and BiVO<sub>4</sub> seed.

**Table S1.** Binding energies obtained from deconvolution of core-level XPS spectra of Bi 4f, V 2p and O 1s.

| Samples                | Binding energies (eV) |                      |      |                |                 |                  |                     |                     |               |
|------------------------|-----------------------|----------------------|------|----------------|-----------------|------------------|---------------------|---------------------|---------------|
|                        | Bi 4f                 |                      |      | O 1s           |                 |                  | V 2p                |                     |               |
|                        | Bi 4f <sub>7/2</sub>  | Bi 4f <sub>5/2</sub> | Δ    | O <sub>I</sub> | O <sub>II</sub> | O <sub>III</sub> | V 2p <sub>3/2</sub> | V 2p <sub>1/2</sub> | Δ             |
| Seed                   | 158.67                | 163.97               | 5.30 | 529.36         | 530.69          | 532.21           | 516.40              | 523.79              | 7.39          |
| DI+HNO <sub>3</sub>    | 158.99                | 164.30               | 5.31 | 529.65         | 532.09          | -                | 516.56              | 524.05              | 7.49          |
| DI+EG                  | 159.01                | 164.33               | 5.32 | 529.69         | 530.72          | 532.23           | 516.97,<br>515.82   | 524.42,<br>523.37   | 7.45,<br>7.55 |
| EtOH+ HNO <sub>3</sub> | 159.24                | 164.55               | 5.31 | 530.05         | 531.48          | -                | 517.18              | 524.50              | 7.32          |
| MeOH+ HNO <sub>3</sub> | 159.11                | 164.42               | 5.31 | 529.98         | 531.74          | -                | 517.01              | 524.38              | 7.37          |
